# Supplementary material for: Development of diselenide-based fluorogenic system for the selective and sensitive detection of the Hg( ii ) in aqueous media
Source: Royal Society of Chemistry journal article supplement (doi:10.1039/d4dt02967d), 2025-01-01
Supplement: d4dt02967d1.pdf [file d4dt02967d1.pdf]

## Supporting Information

### Development of diselenide-based fluorogenic system for the selective and sensitive detection of the Hg(II) in aqueous media

Gauri S. Malankar<sup>a,c</sup>, Divyesh S. Shelar<sup>a</sup>, Ray J. Butcher<sup>b</sup>, Sudesh T. Manjare<sup>a\*</sup>

<sup>a</sup> Department of Chemistry, University of Mumbai, Mumbai, 400098, India.

<sup>b</sup> Howard University. Washington DC, USA.

<sup>c</sup> Oregon Health and Science University, Portland, Oregon, USA

Email: [sudeshmanjare@chemistry.mu.ac.in](mailto:sudeshmanjare@chemistry.mu.ac.in)

**Keywords:** Diselenide, Detection of Hg(II), Turn-on fluorescence, Fluorogenic probes, Rhodamine based organoselenium

## TABLE OF CONTENTS

| <b>SR. NO.</b> | <b>DESCRIPTION</b>                                                          | <b>PAGE NO.</b> |
|----------------|-----------------------------------------------------------------------------|-----------------|
| <b>1</b>       | Experimental Section                                                        | 3-4             |
| <b>2</b>       | NMR ( $^1\text{H}$ , $^{13}\text{C}$ , $^{77}\text{Se}$ ) of probe <b>3</b> | 5-6             |
| <b>3</b>       | Mass spectrum of probe <b>3</b>                                             | 6               |
| <b>4</b>       | X-ray refinement details of probe <b>3</b>                                  | 7               |
| <b>5</b>       | Photophysical spectra of probe <b>3</b>                                     | 8-12            |
| <b>6</b>       | $^1\text{H}$ NMR spectrum of compound <b>4</b>                              | 13-14           |
| <b>7</b>       | Mass spectra of compound <b>4</b>                                           | 15-16           |
| <b>8</b>       | MTS assay and imaging study                                                 | 17-18           |
| <b>9</b>       | Comparative Table of rhodamine sensors                                      | 18-19           |

## Experimental Section

### Quantum yield

Quantum yield was calculated according to the formula (1),

$$\phi = (\phi_R) (I/I_R) (A_R/A) (\eta^2/\eta_R^2) \quad (1)$$

Where,

$\phi$  is the quantum yield,

$I$  is integrated area under the corrected emission spectra,

$A$  is absorbance at excitation wavelength,

$\eta$  is refractive index.

The subscript  $R$  refers to the reference fluorophore of known quantum yield. Fluorescein diluted with 0.1 M NaOH used as a standard, which has quantum yield of 0.95.<sup>1</sup> The excitation and emission slit width used for the experiment was 1.5 nm/1.5 nm. Emission spectra were obtained maintaining nearly equal absorbance (0.2).

### pH study

The probe (**3**) (2.5  $\mu$ M) was added with Hg(II) (50 equiv, 125  $\mu$ M) in 10 mM PBS. PBS buffer of 10 mM concentration was used with a pH range from 2-12. The solutions were incubated for 30 min at room temperature and fluorescence spectra were recorded at  $\lambda_{\text{ex}}$  559 nm.

### Time dependent study

The time dependent study of the probe (**3**) was performed using 2.5  $\mu$ M of the probe (**3**) solution and 125  $\mu$ M of Hg(II) solution. In the probe solution (**3**), analyte Hg(II) was added and the spectrum was recorded for 75 min at  $\lambda_{\text{ex}}$  559 nm and  $\lambda_{\text{em}}$  579 nm with slit width 3 nm/3 nm.

### Detection limit

Increasing concentration study was performed to calculate detection limit of the probe. To the probe (**3**) solution, 0 – 50 equivalent of Hg(II) solution was added in increasing fashion. The solution was incubated for 30 min at room temperature. Detection limit was calculated using the following equation (2).

$$\text{Detection Limit} = 3\sigma/k \quad (2)$$

Where  $\sigma$  is standard deviation

$k$  is slope.

Standard deviation was calculated by taking 10 readings of the probe solutions.

### **Interference study**

For this experiment, the probe solution **3** (2.5  $\mu\text{M}$ ) was incubated with 125  $\mu\text{M}$  of Hg(II) solution and then the other metal ions ( $\text{Hg}^{2+}$ ,  $\text{Cu}^{2+}$ ,  $\text{Ca}^{2+}$ ,  $\text{Na}^+$ ,  $\text{Co}^{2+}$ ,  $\text{K}^+$ ,  $\text{Zn}^{2+}$ ,  $\text{Al}^{3+}$ ,  $\text{Fe}^{2+}$ ,  $\text{Cd}^{2+}$ ,  $\text{Mn}^{2+}$ ,  $\text{Ag}^+$ ,  $\text{Fe}^{3+}$ ,  $\text{Pb}^{2+}$ ,  $\text{Au}^{3+}$ ,  $\text{Pt}^{4+}$ ) (50 equiv, 125  $\mu\text{M}$ ) in water were added. The fluorescence measurements were obtained after incubation of 30 min at room temperature at an excitation maxima 559 nm.

### **Job's plot**

Job's plot experiment was performed using continuous variation method of the probe in presence of Hg(II). The probe (**3**) (100  $\mu\text{M}$ ) was taken as 747.1  $\mu\text{L}$ , 672.4  $\mu\text{L}$ , 597.7  $\mu\text{L}$ , 523.0  $\mu\text{L}$ , 448.3  $\mu\text{L}$ , 373.5  $\mu\text{L}$ , 298.8  $\mu\text{L}$ , 224.1  $\mu\text{L}$ , 149.4  $\mu\text{L}$ , 74.7  $\mu\text{L}$ , 0.0  $\mu\text{L}$  in different vials and was diluted with water, to that Hg(II) (100  $\mu\text{M}$ ) was added as 0.0  $\mu\text{L}$ , 74.7  $\mu\text{L}$ , 149.4  $\mu\text{L}$ , 224.1  $\mu\text{L}$ , 298.8  $\mu\text{L}$ , 373.5  $\mu\text{L}$ , 448.3  $\mu\text{L}$ , 523.0  $\mu\text{L}$ , 597.7  $\mu\text{L}$ , 672.4  $\mu\text{L}$ , 747.1  $\mu\text{L}$  to each vial, respectively. The solutions were incubated for 30 min and the absorbance readings were recorded.

### **Reversibility study**

To check the reversibility of the probe (**3**) with Hg(II) in presence of biothiols, the probe (**3**) were reacted with 125  $\mu\text{M}$  of Hg(II) and then 125  $\mu\text{M}$  of biothiols (DL-homocysteine, L-cysteine, glutathione, N-acetyl-L-cysteine, and  $\text{Na}_2\text{S}$ ) were added to the solution and incubated for another 30 min. Then, the spectra were recorded. Further, to check the redox cycle of the probe (**3**), the same experiment was performed continuously with 125  $\mu\text{M}$  of  $\text{Na}_2\text{S}$  and 125  $\mu\text{M}$  of Hg(II) in the same sample vial.

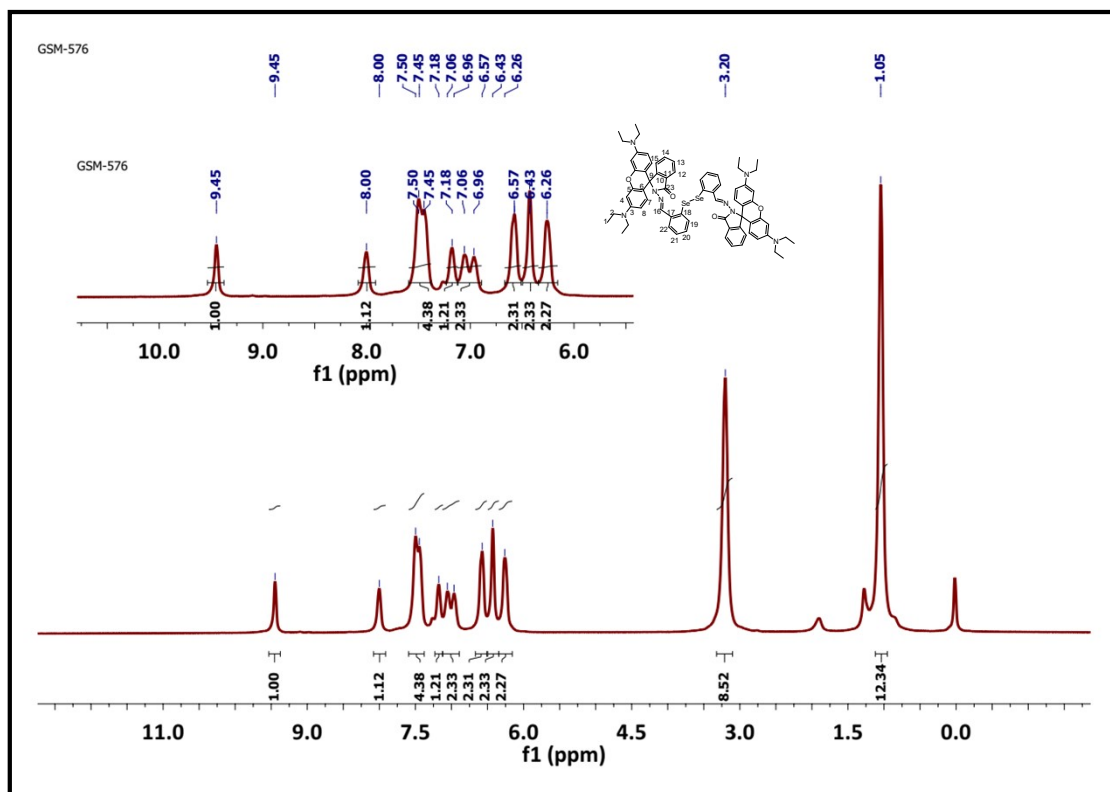

Fig. S1.  $^1\text{H}$  NMR spectrum of probe 3 in  $\text{CDCl}_3$ .

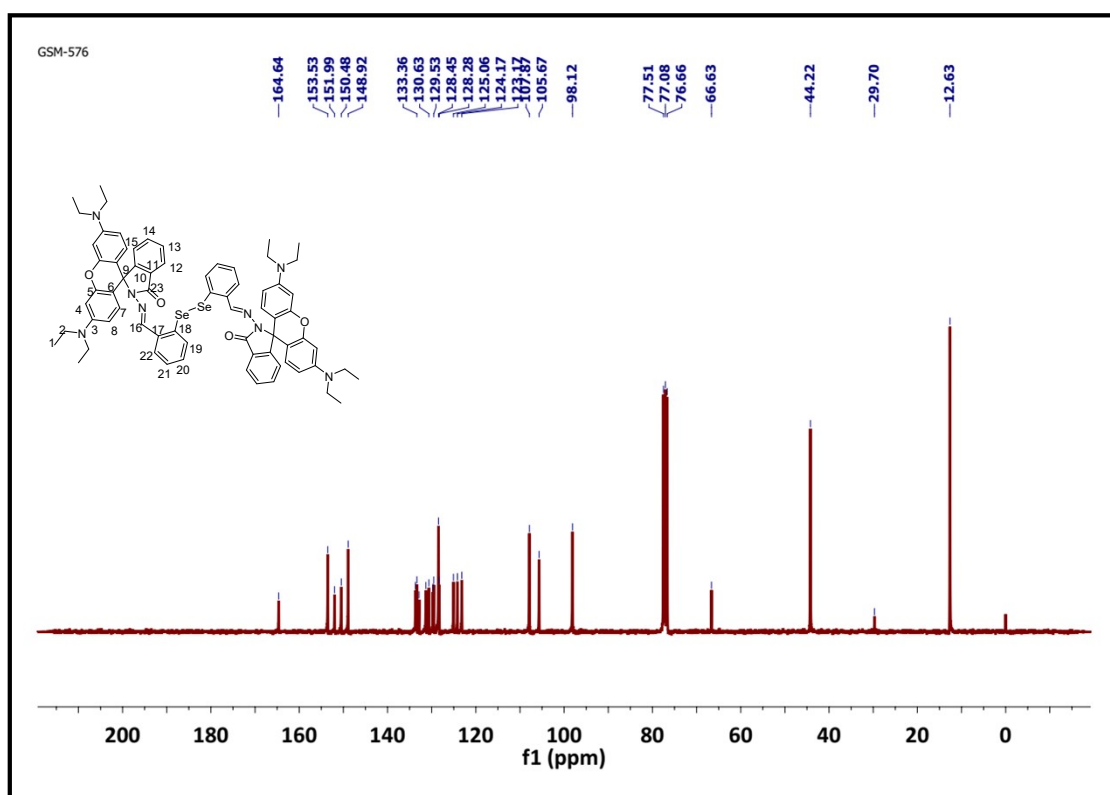

Fig. S2.  $^{13}\text{C}$  NMR spectrum of probe 3 in  $\text{CDCl}_3$ .

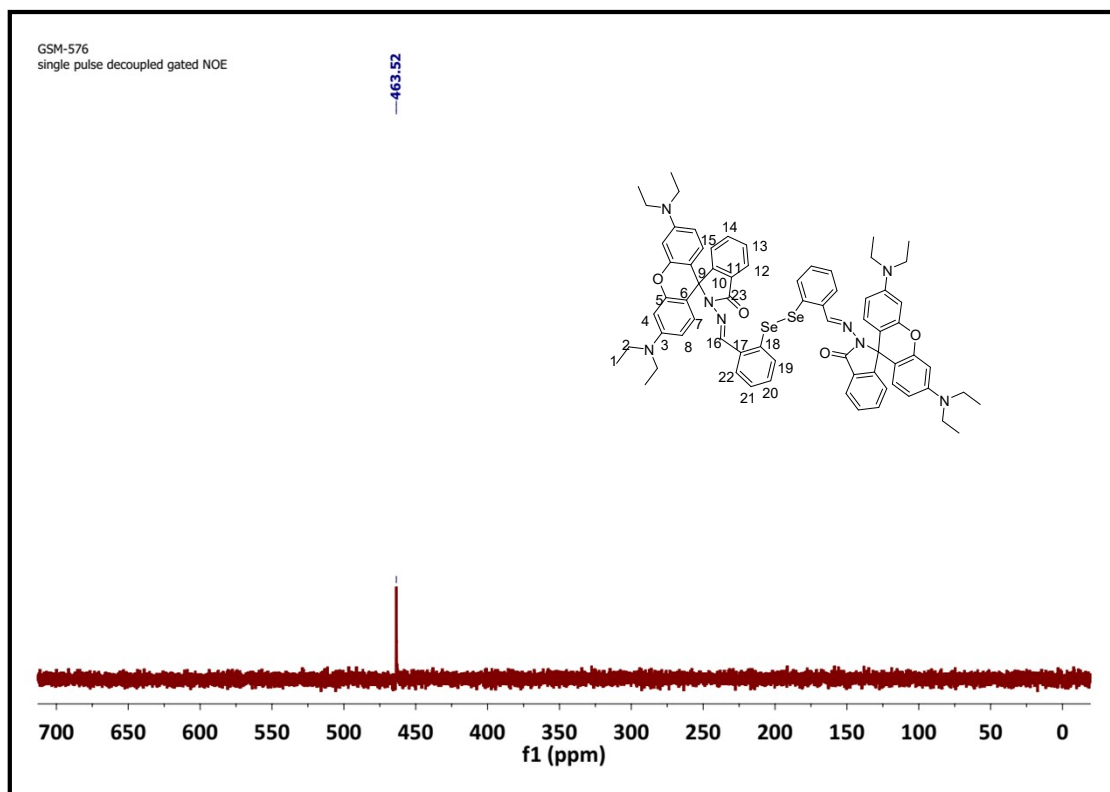

Fig. S3. The  $^{77}\text{Se}$  NMR spectrum of probe **3** in  $\text{CDCl}_3$ .

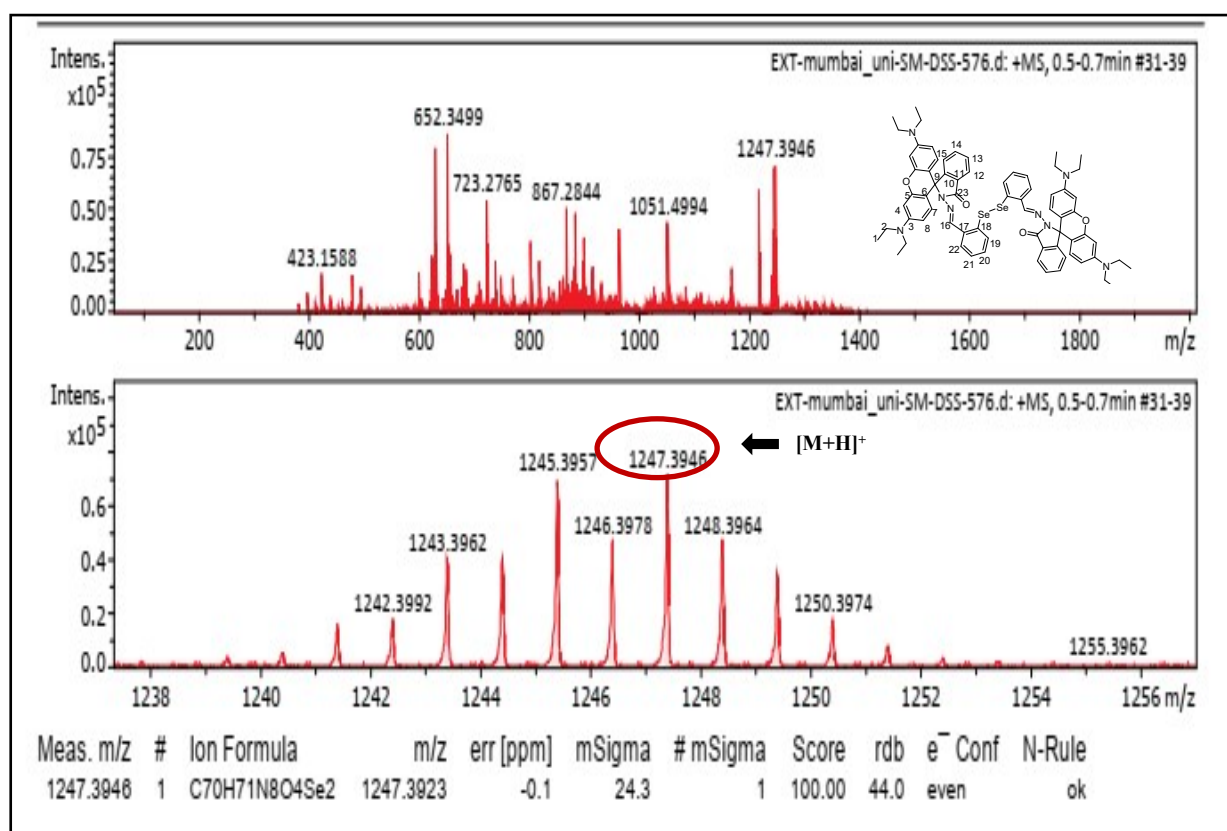

Fig. S4. Mass spectrum of probe **3**.

**Table S1.** Refinement details of X-ray structure of the probe **3** (#CCDC: 2393067).

| <b>Compound</b>                        | <b>Probe 3</b>                                                                |
|----------------------------------------|-------------------------------------------------------------------------------|
| <b>Formula</b>                         | C <sub>70</sub> H <sub>70</sub> N <sub>8</sub> O <sub>4</sub> Se <sub>2</sub> |
| <b>Crystal System</b>                  | Tetragonal                                                                    |
| <b>Space Group</b>                     | P-4b2                                                                         |
| <b>T/K</b>                             | 100(2)                                                                        |
| <b>a [ Å<sup>0</sup>]</b>              | 21.474(4) Å                                                                   |
| <b>b [ Å<sup>0</sup>]</b>              | 21.474(4) Å                                                                   |
| <b>c [ Å<sup>0</sup>]</b>              | 13.425(3) Å                                                                   |
| <b>α [°]</b>                           | 90.00(3)°                                                                     |
| <b>β [°]</b>                           | 90.00(3)°                                                                     |
| <b>γ [°]</b>                           | 90.00(3)°                                                                     |
| <b>V [Å<sup>3</sup>]</b>               | 6191(3) Å <sup>3</sup>                                                        |
| <b>Z</b>                               | 4                                                                             |
| <b>ρ<sub>cal</sub>Mg/m<sup>3</sup></b> | 1.336                                                                         |
| <b>μ(mm<sup>-1</sup>)</b>              | 1.251                                                                         |
| <b>F(000)</b>                          | 2584                                                                          |
| <b>Crystal Size [mm<sup>3</sup>]</b>   | 0.260 x 0.250 x 0.210                                                         |
| <b>GOF</b>                             | 1.029                                                                         |
| <b>2θ range (deg)</b>                  | 2.025 to 28.294°                                                              |
| <b>Reflections collected</b>           | 39151                                                                         |
| <b>Independent reflections</b>         | 7614                                                                          |
| <b>Parameters</b>                      | 479                                                                           |
| <b>R<sub>int</sub></b>                 | 0.0491                                                                        |
| <b>R<sub>1</sub>,wR2[I&gt;2σ(I)]</b>   | R1 = 0.0334, wR2 = 0.0736                                                     |
| <b>R<sub>1</sub>,wR2[I&gt;2σ(I)]</b>   | R1 = 0.0482, wR2 = 0.0796                                                     |

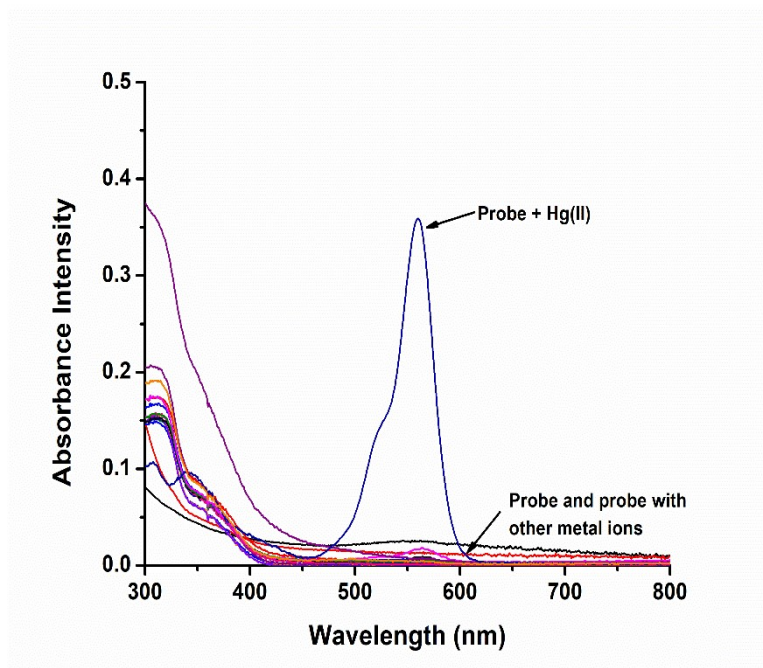

**Fig. S5.** Absorption spectra of the probe (**3**) (2.5  $\mu\text{M}$ ) with metal ions ( $\text{Hg}^{2+}$ ,  $\text{Cu}^{2+}$ ,  $\text{Ca}^{2+}$ ,  $\text{Na}^+$ ,  $\text{Co}^{2+}$ ,  $\text{K}^+$ ,  $\text{Zn}^{2+}$ ,  $\text{Al}^{3+}$ ,  $\text{Fe}^{2+}$ ,  $\text{Cd}^{2+}$ ,  $\text{Mn}^{2+}$ ,  $\text{Ag}^+$ ,  $\text{Fe}^{3+}$ ,  $\text{Pb}^{2+}$ ,  $\text{Au}^{3+}$ ,  $\text{Pt}^{4+}$ , 50 equiv) in water incubated for 30 min at rt.

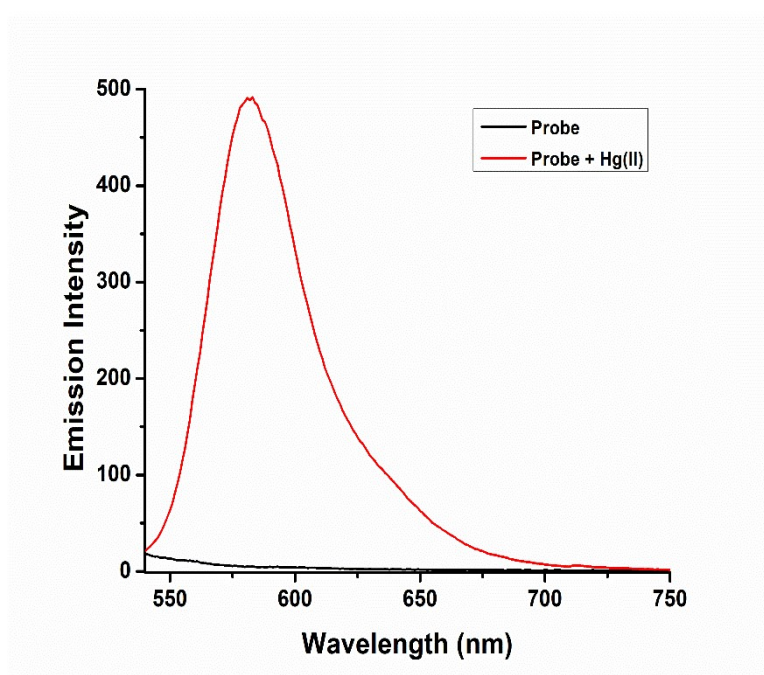

**Fig. S6.** Fluorescence spectra of probe **3** (2.5  $\mu\text{M}$ ) with  $\text{Hg}(\text{II})$  (50 equiv) in water incubated for 30 min.  $\lambda_{\text{ex}} = 500 \text{ nm}$ ,  $\lambda_{\text{em}} = 579 \text{ nm}$ ,



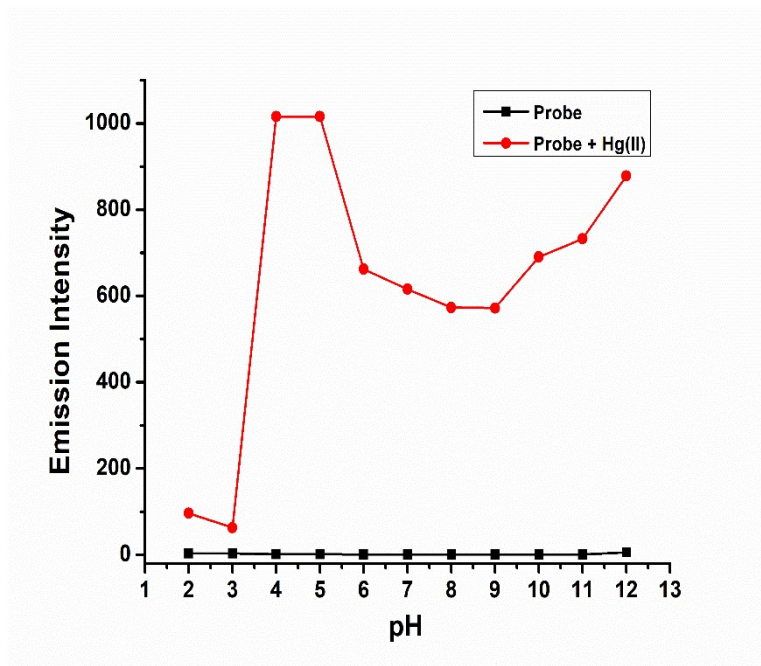

**Fig. S7.** Fluorescence intensity changes of probe **3** (2.5  $\mu\text{M}$ , black) and probe **3** (2.5  $\mu\text{M}$ ) with 50 equiv of  $\text{Hg}^{2+}$  (red) in the solution (10 mM PBS) incubated for 30 min.  $\lambda_{\text{ex}} = 559 \text{ nm}$ ,  $\lambda_{\text{em}} = 579 \text{ nm}$ , slit width 3 nm/3 nm, under different pH range.

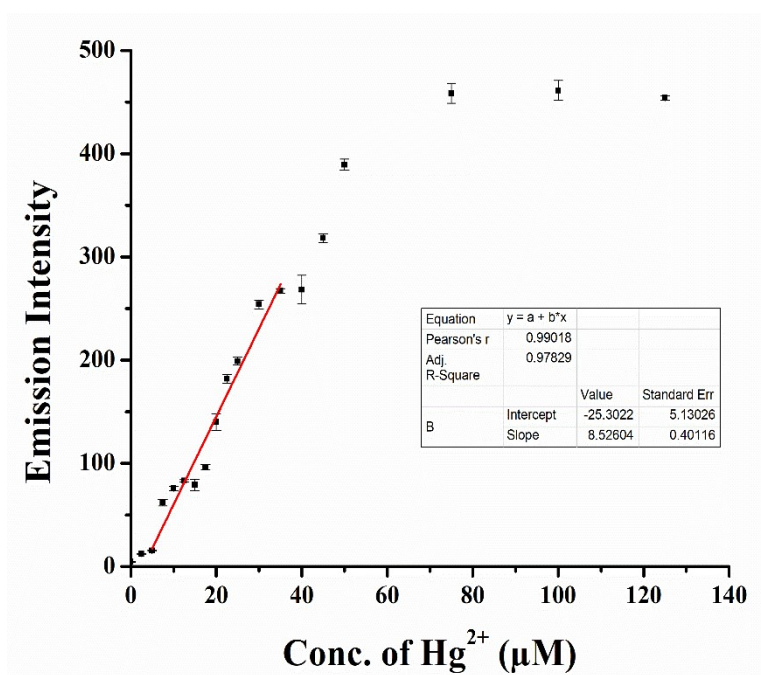

**Fig. S8.** Plot for the calculation of limit of detection from the emission of probe **3** (2.5  $\mu\text{M}$ , water) with increasing concentration of  $\text{Hg}^{2+}$  (0 to 50 equiv) incubated for 30 min at rt;  $\lambda_{\text{ex}} = 559 \text{ nm}$ ,  $\lambda_{\text{em}} = 579 \text{ nm}$ , slit width 3 nm/3 nm (average of three experiments).

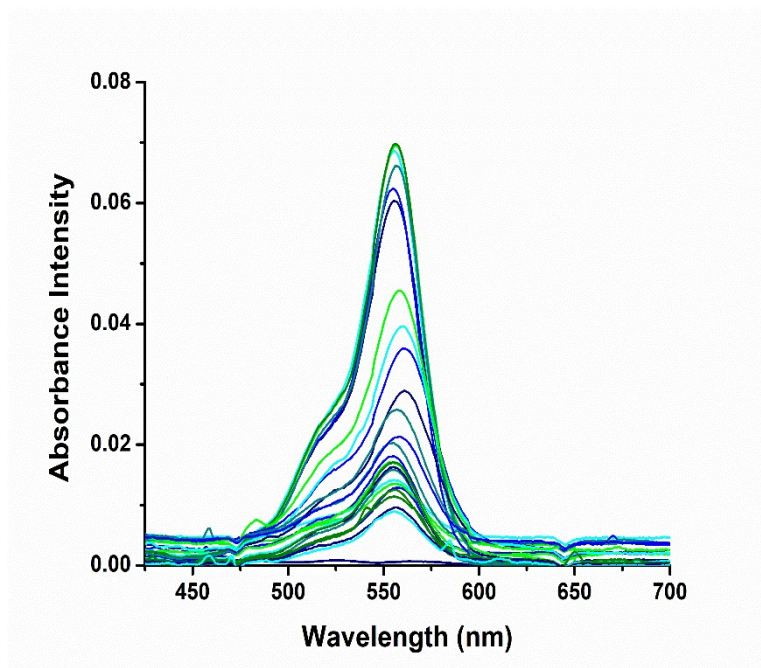

**Fig. S9.** Absorbance spectral changes of probe **3** (2.5  $\mu\text{M}$ ) with various concentrations of  $\text{Hg(II)}$  (0 - 50 equiv) in water incubated for 30 min.

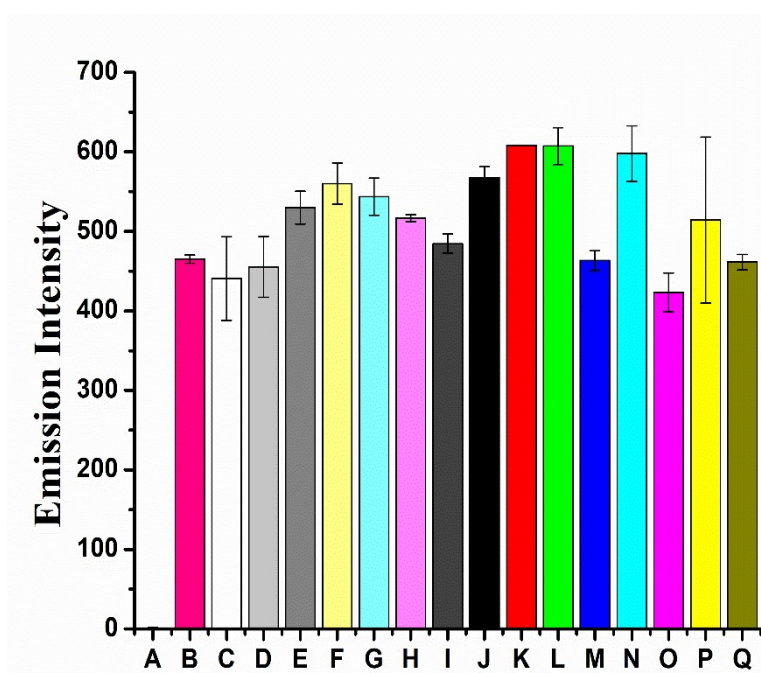

**Fig. S10.** Fluorescence intensity of probe **3** (2.5  $\mu\text{M}$ ) and  $\text{Hg}^{2+}$  (50 equiv) with metal ions ( $\text{Hg}^{2+}$ ,  $\text{Cu}^{2+}$ ,  $\text{Ca}^{2+}$ ,  $\text{Na}^{+}$ ,  $\text{Co}^{2+}$ ,  $\text{K}^{+}$ ,  $\text{Zn}^{2+}$ ,  $\text{Al}^{3+}$ ,  $\text{Fe}^{2+}$ ,  $\text{Cd}^{2+}$ ,  $\text{Mn}^{2+}$ ,  $\text{Ag}^{+}$ ,  $\text{Fe}^{3+}$ ,  $\text{Pb}^{2+}$ , 50 equiv) (A = probe **3**, B = probe **3** +  $\text{Hg}^{2+}$ , C = probe **3** +  $\text{Hg}^{2+}$  +  $\text{Cu}^{2+}$ , D = probe **3** +  $\text{Hg}^{2+}$  +  $\text{Ca}^{2+}$ , E = probe **3** +  $\text{Hg}^{2+}$  +  $\text{Na}^{+}$ , F = probe **3** +  $\text{Hg}^{2+}$  +  $\text{Co}^{2+}$ , G = probe **3** +  $\text{Hg}^{2+}$  +  $\text{K}^{+}$ , H = probe **3** +  $\text{Hg}^{2+}$  +  $\text{Zn}^{2+}$ , I = probe **3** +  $\text{Hg}^{2+}$  +  $\text{Al}^{3+}$ , J = probe **3** +  $\text{Hg}^{2+}$  +  $\text{Fe}^{2+}$ , K = probe **3** +  $\text{Hg}^{2+}$  +  $\text{Cd}^{2+}$ , L =

probe **3** + Hg<sup>2+</sup> + Mn<sup>2+</sup>, M = probe **3** + Hg<sup>2+</sup> + Ag<sup>+</sup>, N = probe **3** + Hg<sup>2+</sup> + Fe<sup>3+</sup>, O = probe **3** + Hg<sup>2+</sup> + Pb<sup>2+</sup>, P = probe **3** + Hg<sup>2+</sup> + Au<sup>3+</sup>, Q = probe **3** + Hg<sup>2+</sup> + Pt<sup>4+</sup> in water incubated for 30 min.  $\lambda_{\text{ex}} = 559 \text{ nm}$ ,  $\lambda_{\text{em}} = 579 \text{ nm}$ , slit width 3 nm/3 nm.

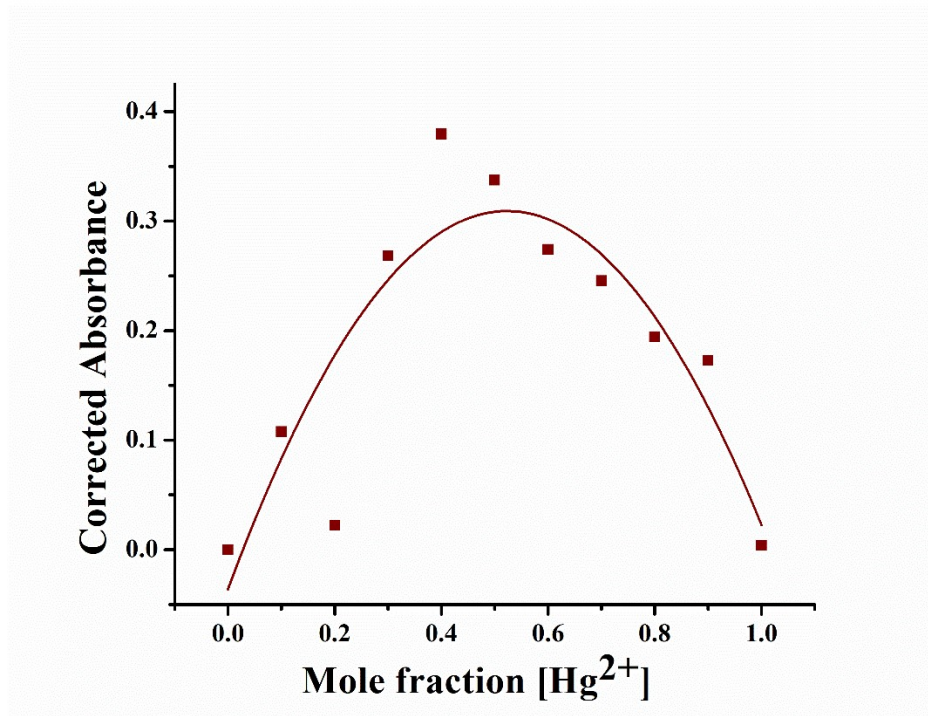

**Fig. S11.** Job's plot of the probe (**3**) with Hg<sup>2+</sup> metal ion complex in water incubated for 30 min. The total concentration of the probe and Hg<sup>2+</sup> was 100  $\mu\text{M}$ . The monitored wavelength was 559 nm.

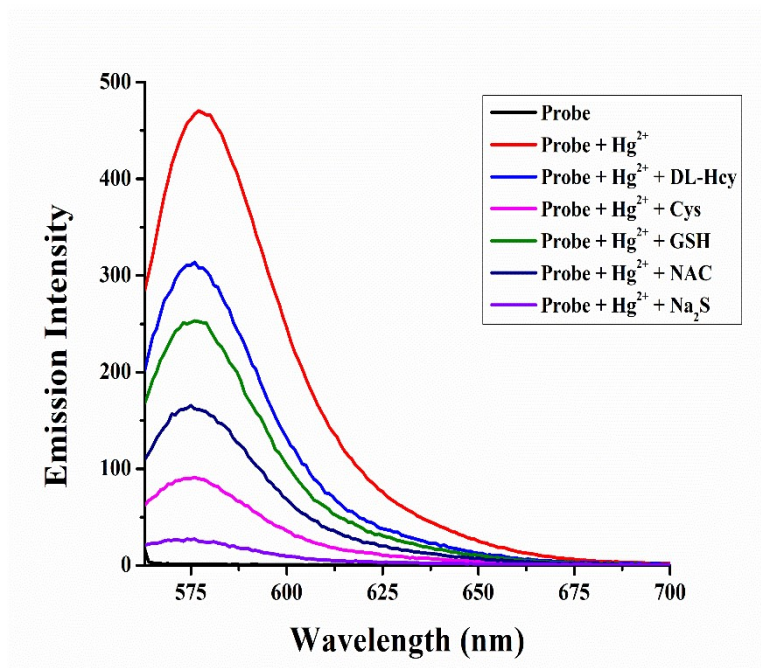

**Fig. S12.** Fluorescence response of probe **3** (2.5  $\mu\text{M}$ ) with  $\text{Hg}^{2+}$  (50 equiv) in water incubated for 30 min and after addition of biothiols (DL-homocysteine, L-cysteine, glutathione, N-acetyl-L-cysteine, and  $\text{Na}_2\text{S}$ , 50 equiv) incubated for 30 min at rt,  $\lambda_{\text{ex}} = 559 \text{ nm}$ ,  $\lambda_{\text{em}} = 579 \text{ nm}$ , slit width 3 nm/3 nm.

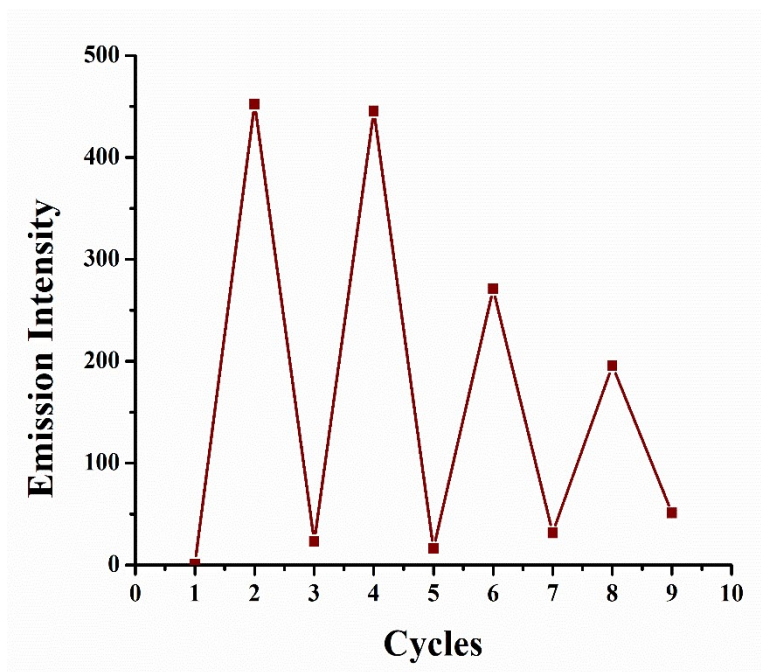

**Fig. S13.** Redox cycles of probe **3** (2.5  $\mu\text{M}$ ) with 50 equiv of  $\text{Na}_2\text{S}$  in water  $\lambda_{\text{ex}} = 559 \text{ nm}$ ,  $\lambda_{\text{em}} = 579 \text{ nm}$ , slit width 3 nm/3 nm.

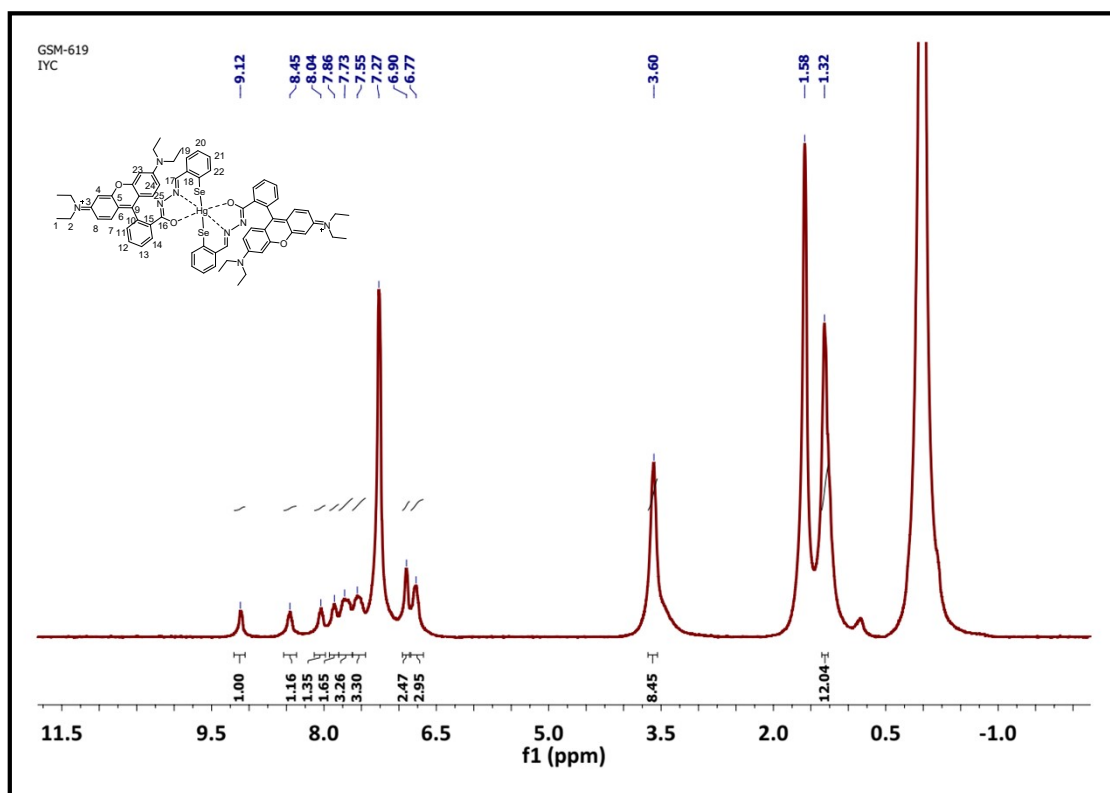

**Fig. S14.**  $^1\text{H}$  NMR spectrum of compound **4** in  $\text{CDCl}_3$ .



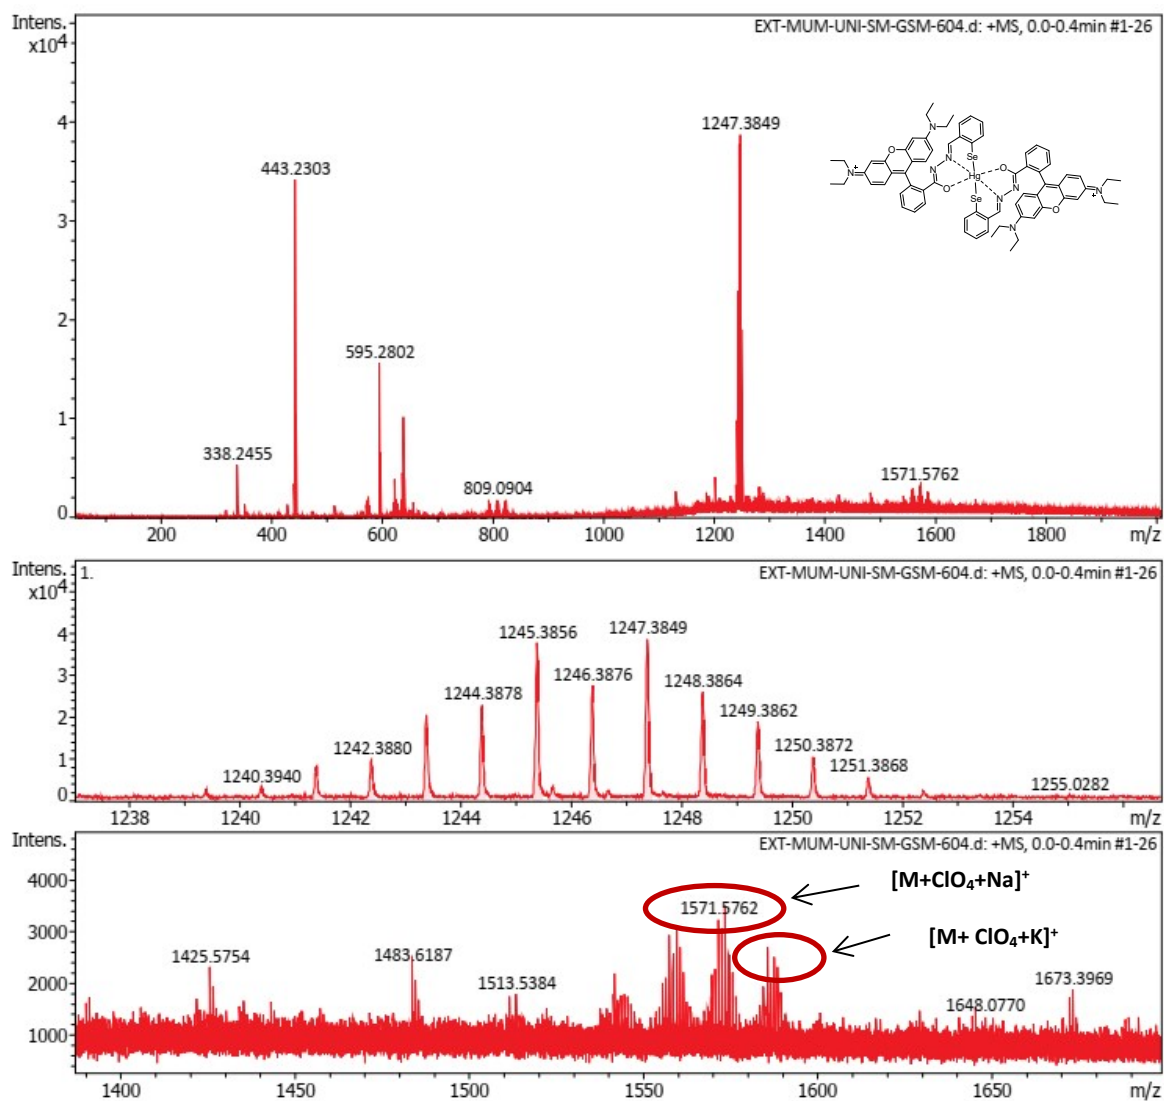

EXT-MUM-UNI-SM-GSM-604.d  
 Bruker Compass DataAnalysis 5.1 printed: 10/28/2021 5:06:59 PM by: PPI IN Page 1 of 1

**Fig. S15.** Mass spectrum of compound 4.

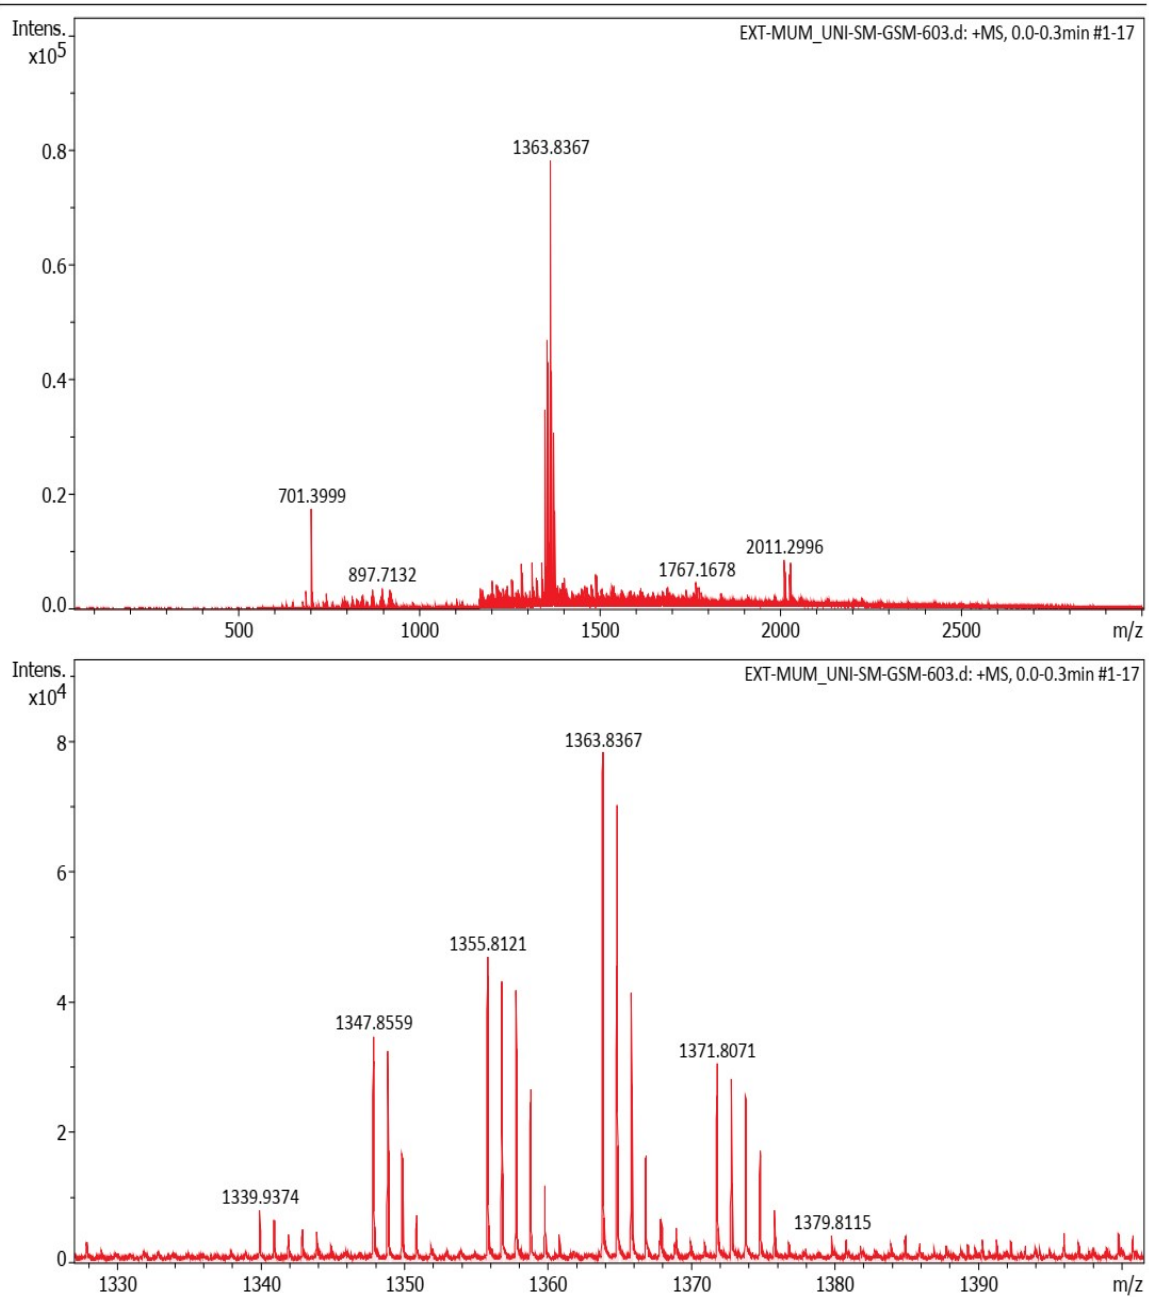

**Fig. S16.** Mass spectrum of compound **4**.

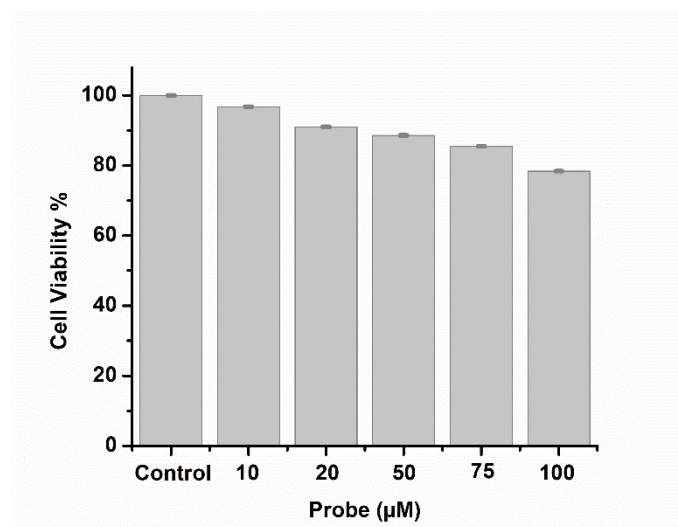

**Fig. S17.** MTS assay U2-OS cell line

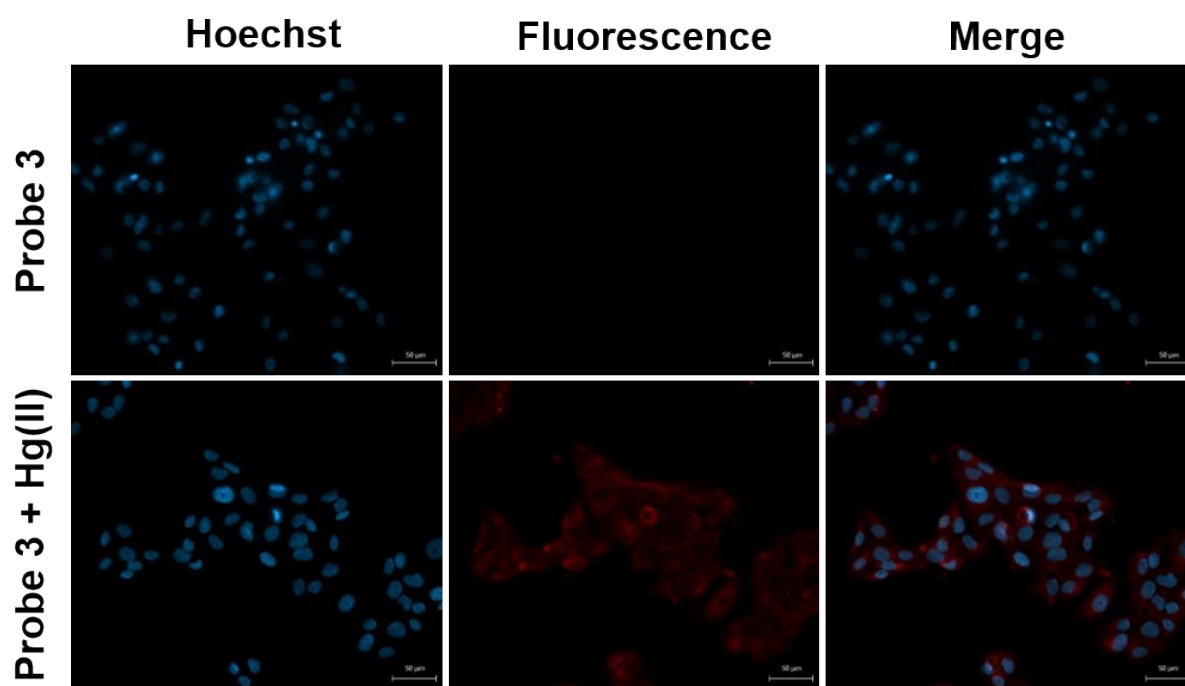

**Fig. S18** Confocal images of U2-OS cell line using 20x objective. Probe (50 µM) and Hg(II) (50 µM). Scale bar is 50 µm.



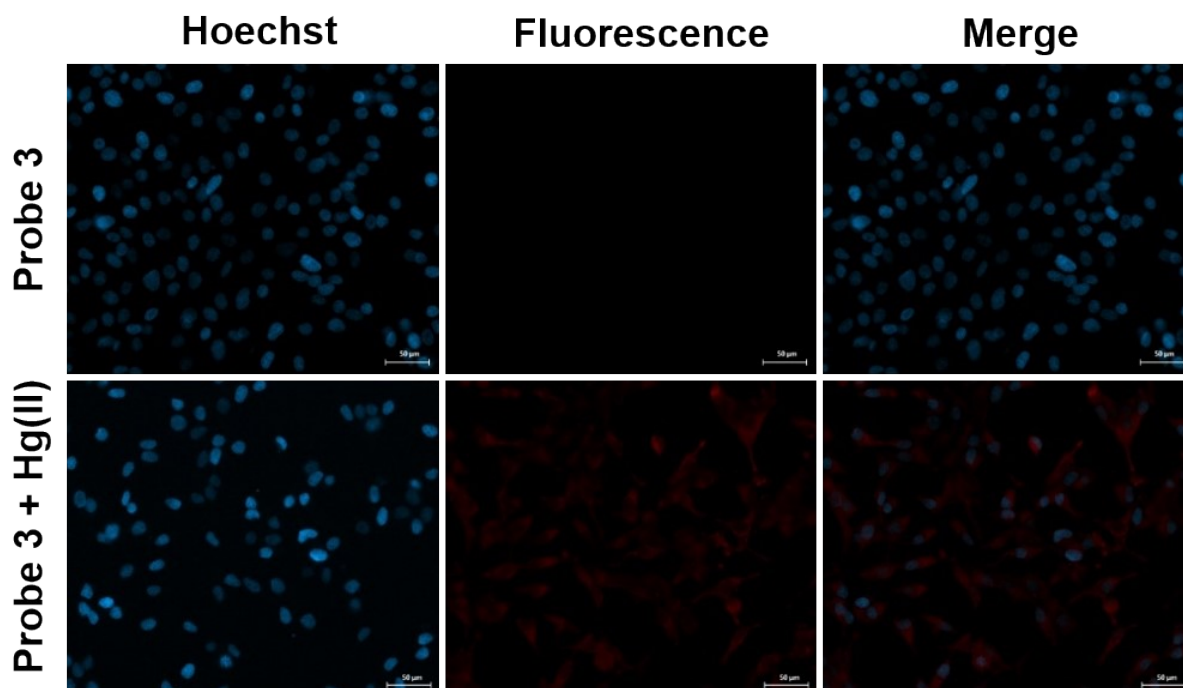

**Fig. S19.** Confocal images of C4-2 cell line using 20x objective. Probe (20  $\mu\text{M}$ ) and Hg(II) (50  $\mu\text{M}$ ). Scale bar is 50  $\mu\text{m}$ .

**Table S2.** Comparison of the current method with other recently reported rhodamine probes selective for Hg(II).

| Sr. No. | Ref No. | LOD                        | Response time | $\lambda_{\text{ex}}$ (nm) | $\lambda_{\text{em}}$ (nm) | Potential Applications                                |
|---------|---------|----------------------------|---------------|----------------------------|----------------------------|-------------------------------------------------------|
| 1       | 2       | $2.1 \times 10^{-9}$ mol/L | 40 min        | 616                        | 672                        | HepG2 cells                                           |
| 2       | 3       | 0.015 $\mu\text{M}$        | <10 s         | 566                        | 596                        | A549 cells, Zebrafish and mice                        |
| 3       | 4       | $9.4 \times 10^{-9}$ M     | -             | 546                        | 567                        | A549 cancer cells                                     |
| 4       | 5       | 10.0 nM                    | 40 min        | 525                        | F649/F463                  | HeLa cells                                            |
| 5       | 6       | 0.26 $\mu\text{M}$         | 210 s         | 620                        | 685                        | HeLa cells, zebrafish.                                |
| 6       | 7       | 0.14 $\mu\text{M}$         | 10s           | 568                        | 594                        | Determination of mercury residues in aquatic samples. |
| 7       | 8       | $9.67 \times 10^{-8}$ M    | 30 min        | 566                        | 594                        | HeLa cell                                             |
| 8       | 9       | 2.76 nM                    | 7 min         | 540                        | 585                        | smartphone APP Color Recognizer                       |
| 9       | 10      | $8 \times 10^{-9}$ M       | -             | 537                        | 559                        | living HeLa cells and the organs of live mice         |

|                  |    |                                                                                       |               |                                               |                                               |                                       |
|------------------|----|---------------------------------------------------------------------------------------|---------------|-----------------------------------------------|-----------------------------------------------|---------------------------------------|
| <b>10</b>        | 11 | 491 nM                                                                                | -             | 365                                           | 584                                           | SiHa cells                            |
| <b>11</b>        | 12 | 17.26 nM                                                                              | <1 min        | 543                                           | -                                             | -                                     |
| <b>12</b>        | 13 | 17.5 nM                                                                               | <1 min        | 613                                           | 665                                           | HeLa cells, Zebrafish, water samples. |
| <b>13</b>        | 14 | 334 nM                                                                                | 12 min        | 558                                           | 582                                           | -                                     |
| <b>14</b>        | 15 | 0.12 $\mu$ M                                                                          | 5 min         | 520                                           | 550                                           | MCF-7                                 |
| <b>15</b>        | 16 | 2.43 $\times 10^{-8}$ M<br>(DMSO-Water)<br>4.54 $\times 10^{-8}$ M<br>(Ethanol-Water) | -             | 320<br>(DMSO-Water)<br>326<br>(Ethanol-Water) | 526<br>(DMSO-Water)<br>540<br>(Ethanol-Water) | HeLa cells, soil sample detection     |
| <b>This Work</b> |    | <b>62.3 nM</b>                                                                        | <b>30 min</b> | <b>559</b>                                    | <b>579</b>                                    | <b>C4-2 cells</b>                     |

## References

1. J. R. Lakowicz, *Principles of Fluorescence Spectroscopy*; 2nd ed; Kluwer Academic/Plenum Publishers, New York, London, Moscow, Dordrecht, 1999.
- 2 X. Wang, H. Yu, and F. Tan, *Spectrochim Acta A Mol Biomol Spectrosc*, 2025, **328**, 125480.
- 3 Y. Liang, X. Wang, M. Chen, B. Musikavanhu, A. Ur Rehman, X. Wang, Z. Xue, and Long Zhao, *Spectrochim Acta A Mol Biomol Spectrosc*, 2025, **328**, 125443.
- 4 N. Ejder, K. Karaoglu, Z. Levent, Y. Alcaay, E. Ozdemir, O. Yavuz, K. Kaya, M. Kopar, N. S. Tuzun, and I. Yilmaz, *J. Mol. Struct.*, 2025, **1321**, 139687.
- 5 N. Li, L. Shi, K. Huang, Q. Wang, and L. Liang, *J. Mol. Struct.*, 2025, **1319**, 139517.
- 6 J. Huang, K. Liu, J. Tian, H. Wei, and C. Kan, *Spectrochim Acta A Mol Biomol Spectrosc*, 2024, **306**, 123553.
- 7 L. Lai, J. Li, Y. Huang, H. Liu, X. Lin, L. Huang, and D. Li, *Spectrochim Acta A Mol Biomol Spectrosc*, 2024, **323**, 124886.
- 8 L. Zhang, J. Guob, and Q. You, *RSC Adv.*, 2024, **14**, 31861.
- 9 S. –K. Wang, Y.-P. Liu, J. Li, W Lang, and Q. –Y. Cao, *Dyes. Pigm*, 2024, **224**, 112005.
- 10 W.-F. Huang, Y. –S. Weng, M. –C. Tseng, and J. –J. Shie, *J. Photochem. Photobiol. A*, 2024, **456**, 115806.
- 11 T. Mishra, S. Guria, J. Sadhukhan, D. Das, M. K. Das, S. S. Adhikari, S. Maity, and P. Maiti

- 
- J. Photochem. Photobiol. A*, 2024, **446**, 115168.
- 12 Y. Li, M. Zhang, J. Tao, L. Zhao, Z. Li, R. Yang, and L. Qu, *Spectrochim Acta A Mol Biomol Spectrosc*, 2024, **311**, 123999.
- 13 P. Patthana, H. –C. Zhong, Q. Wu, T. –B. Ren, and L. Yuan, *Spectrochim Acta A Mol Biomol Spectrosc*, 2024, **318**, 124469.
- 14 A. S. Hussein, F. Lafzi, S. Bayindir, H. Kilic, and M. Toprak, *ChemPlusChem*, 2024, **89**, e202300649.
- 15 L. Li, Y. Yao, X. Wang, Y. Yu, T. Ji, H. Li, Y. Li, and Y. Liu, *J Heterocycl Chem*, 2024, **0**, 1.
- 16 S. Das, M. Das, U. K. Das, B. C. Samanta, A. Bag, A. Patra, N. Bhattacharya, and T. Maity, *Dyes. Pigm.*, 2024, **222**, 111884.
